# Supplementary material for: Aggregation-tuned dual emission of silole derivatives: synthesis, crystal structure, and photophysical properties
Source: Royal Society of Chemistry journal article supplement (doi:10.1039/d0nj00341g), 2020-01-01
Supplement: d0nj00341g1.pdf [file d0nj00341g1.pdf]

## Supporting information

### Aggregation tuned dual emission of silole's derivatives: Synthesis, Crystal Structure and Photophysical Properties

Ruiqi Cao<sup>a</sup>, Liqing Ai<sup>ab</sup>, Hongxia Yang<sup>a</sup>, Shuhong Li<sup>a\*</sup>, Caihong Xu<sup>bc\*</sup>

<sup>a</sup> School of Science, Beijing Technology and Business University, Beijing, 100048, China, [lish@th.btbu.edu.cn](mailto:lish@th.btbu.edu.cn)

<sup>b</sup> Institute of Chemistry, Chinese Academy of Sciences, Beijing, 100190, China, [caihong@iccas.ac.cn](mailto:caihong@iccas.ac.cn)

<sup>c</sup> Shandong Provincial Key Laboratory for Special Silicon-Containing Materials, Shandong Academy of Sciences, Jinan 250014, China

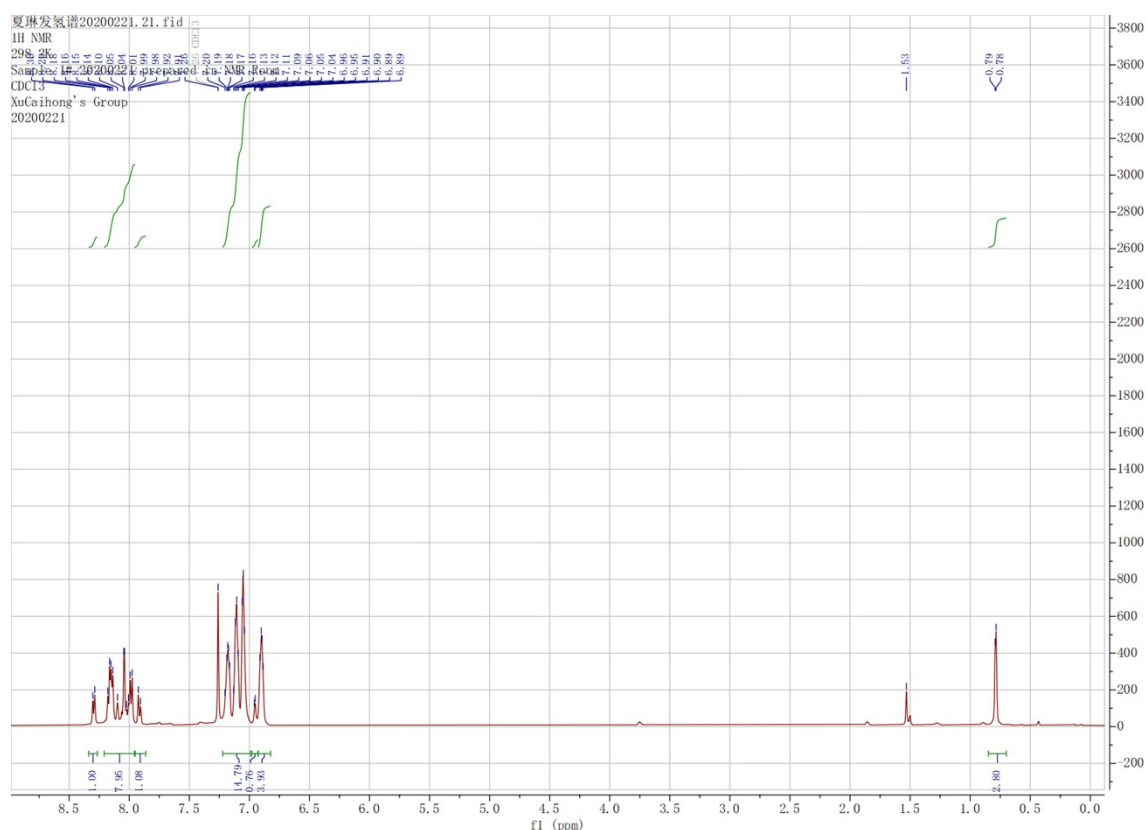

Figure 1S <sup>1</sup>H NMR spectrum of compound 1

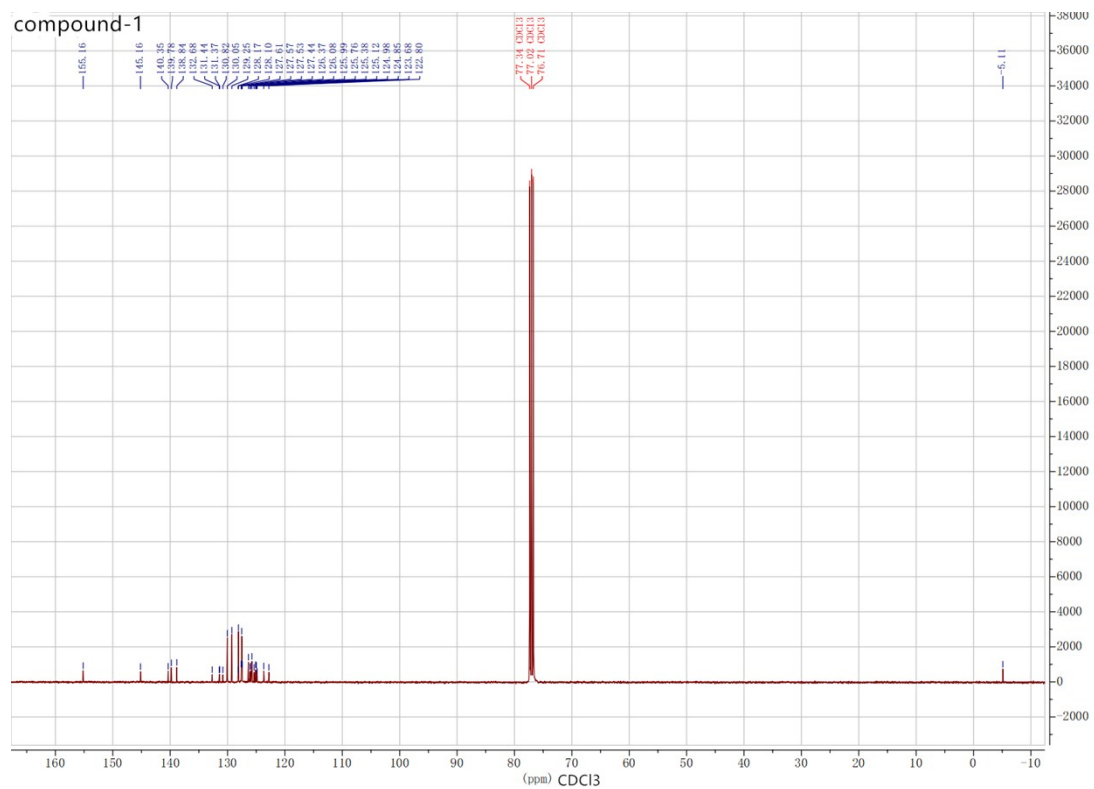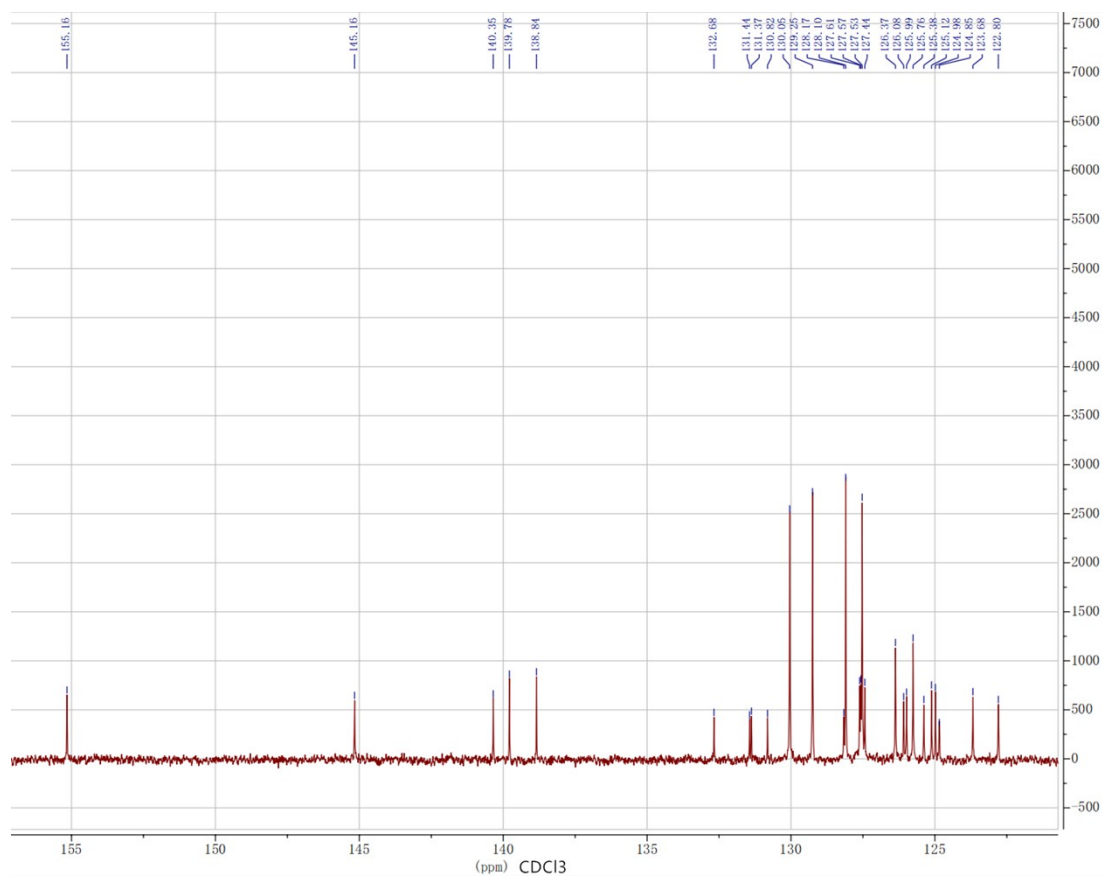

Figure 2S  $^{13}\text{C}$  NMR spectrum of compound 1

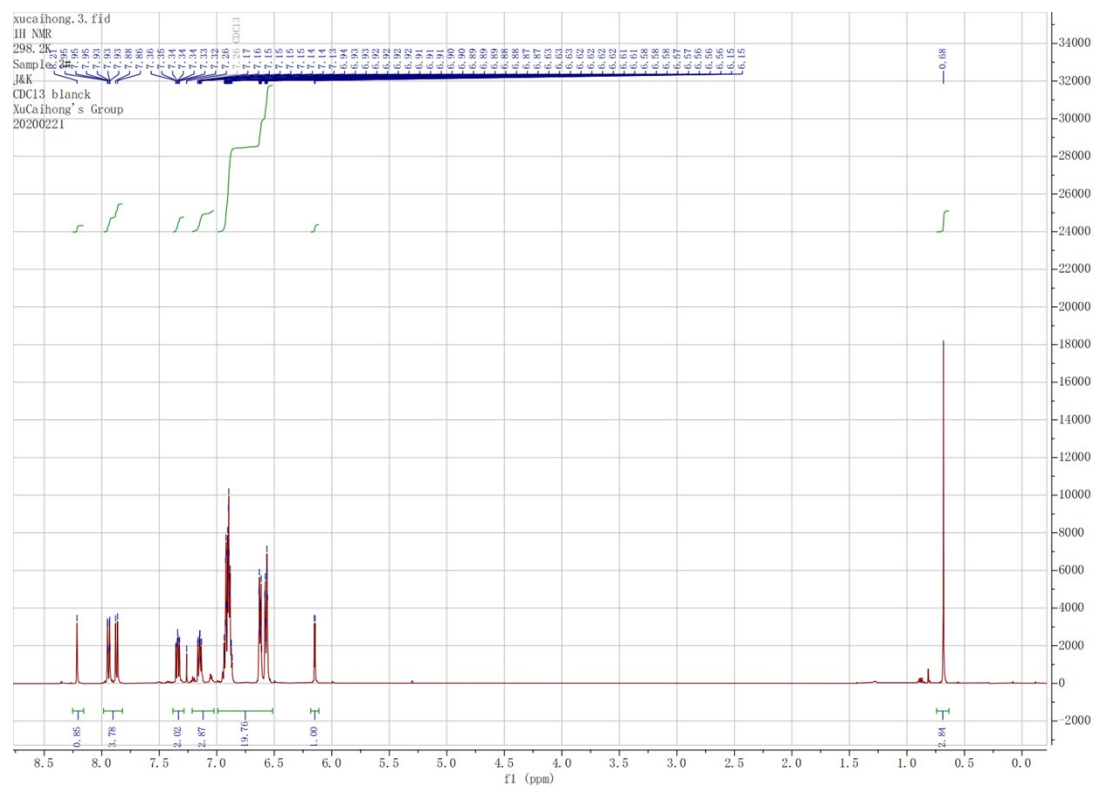

Figure 3S  $^1\text{H}$  NMR spectrum of compound **2**

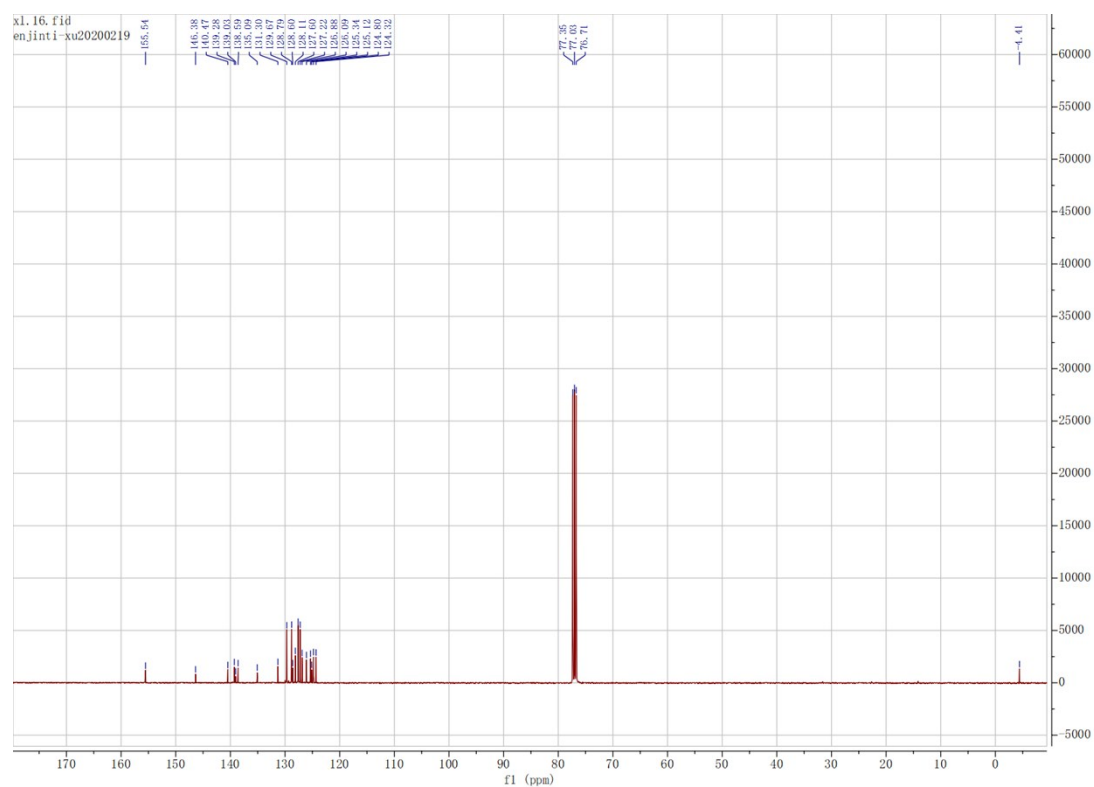

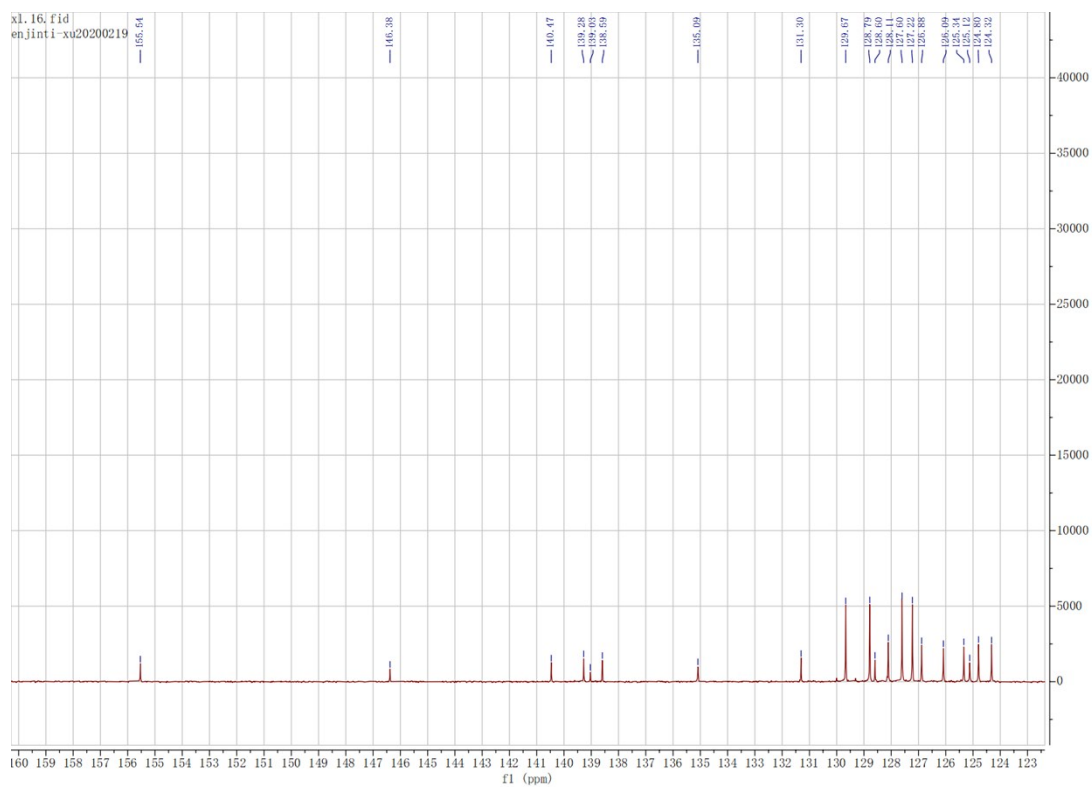

Figure 4S  $^{13}\text{C}$  NMR spectrum of compound **2**

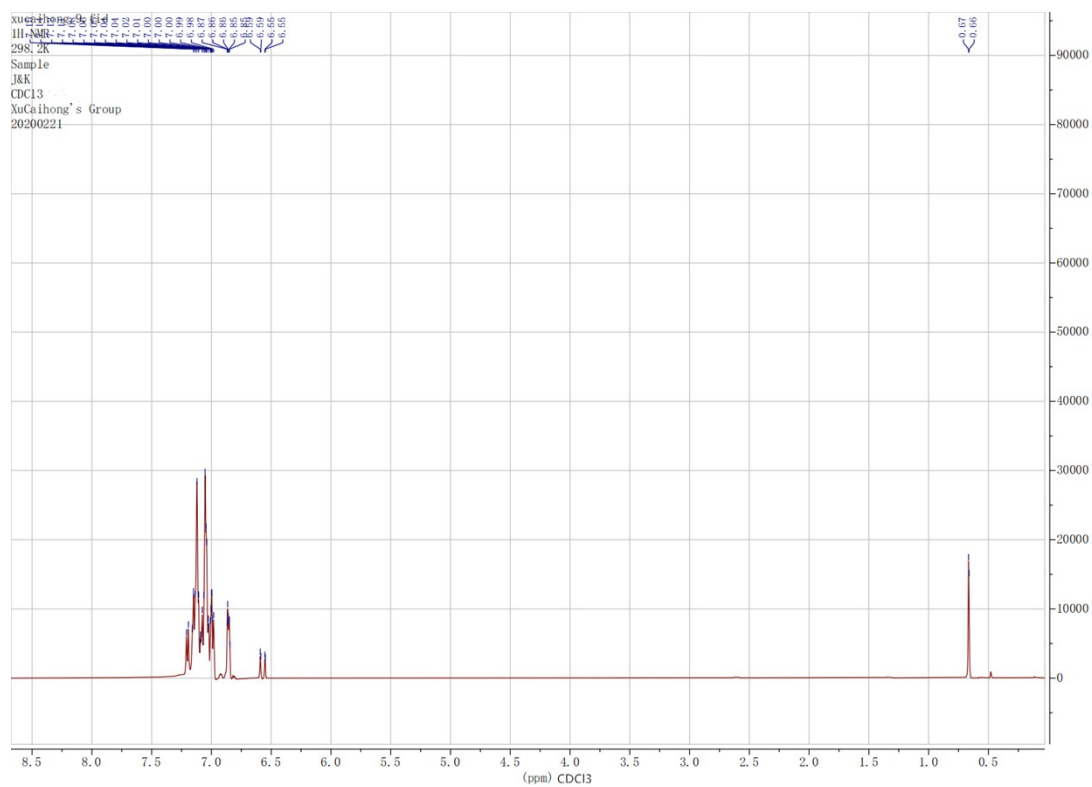

Figure 5S  $^1\text{H}$  NMR spectrum of compound **3**

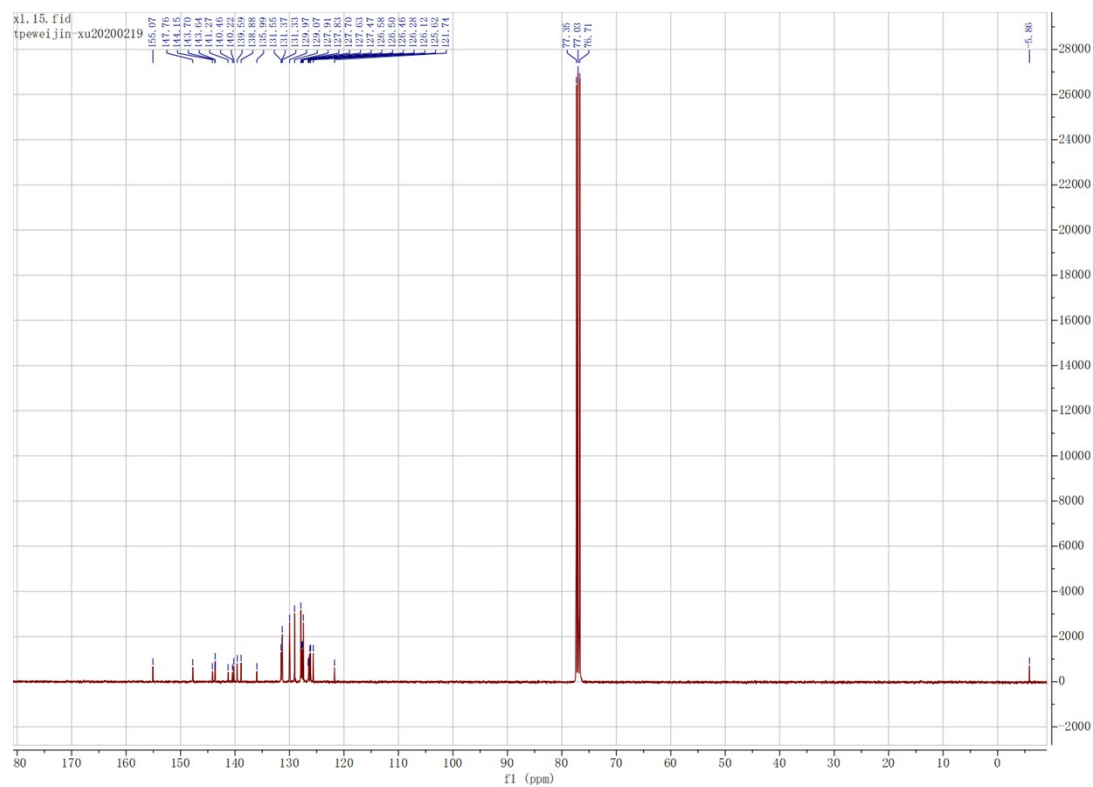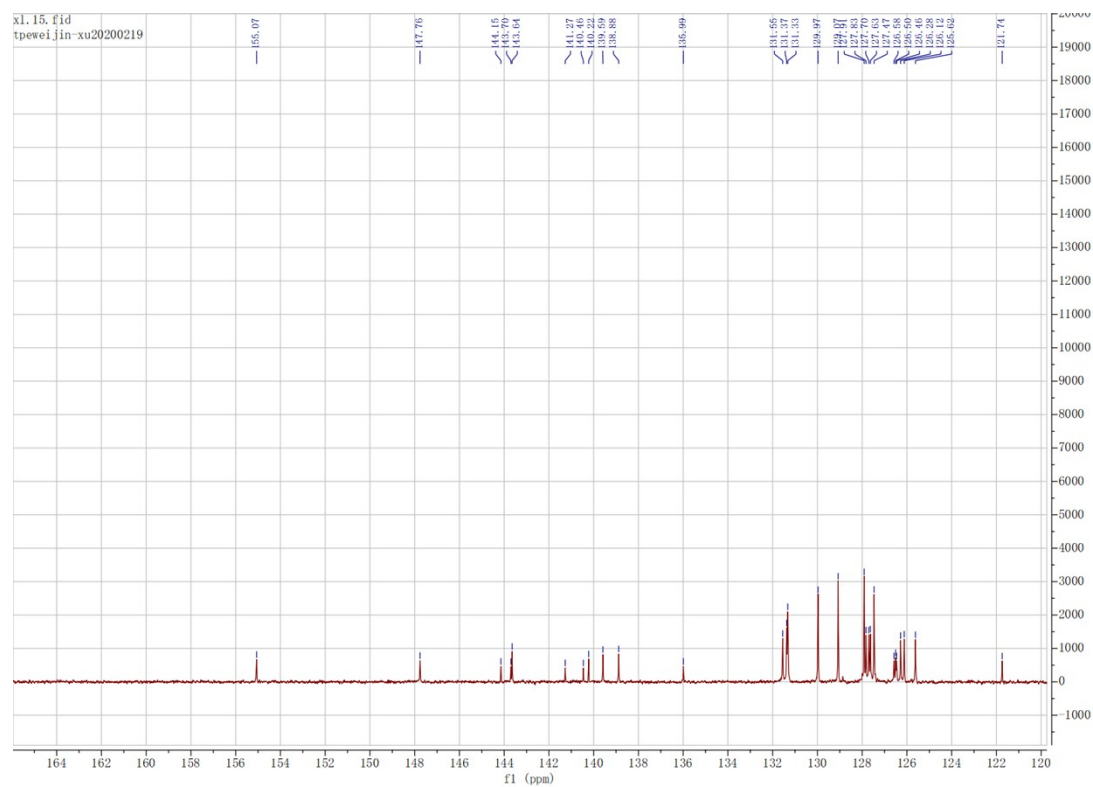

Figure 6S <sup>13</sup>C NMR spectrum of compound **3**

**Table S1.** Crystal data and structure refinements for compounds **1**, **2** and **3**

| Compound                                                 | <b>1</b>                           | <b>2</b>                           | <b>3</b>                           |
|----------------------------------------------------------|------------------------------------|------------------------------------|------------------------------------|
| Empirical Formula                                        | C <sub>47</sub> H <sub>34</sub> Si | C <sub>45</sub> H <sub>34</sub> Si | C <sub>57</sub> H <sub>44</sub> Si |
| Formula Weight                                           | 626.83                             | 602.81                             | 757.01                             |
| Temperature                                              | 173.1500 K                         | 173.1500 K                         | 293(2) K                           |
| Crystal System                                           | Triclinic                          | Triclinic                          | Triclinic                          |
| Space Group                                              | P -1                               | P -1                               | P -1                               |
| Unit Cell                                                | a = 10.390(3) Å                    | a = 10.685(3) Å                    | a = 11.170(2) Å                    |
|                                                          | b = 11.261(3) Å                    | b = 13.039(3) Å                    | b = 12.894(3) Å                    |
|                                                          | c = 16.275(4) Å                    | c = 13.504(3) Å                    | c = 17.928(4) Å                    |
|                                                          | α = 97.171(2)°                     | α = 104.0750(10)°                  | α = 73.46(3)°                      |
|                                                          | β = 103.230(3)°                    | β = 103.729(3)°                    | β = 73.56(3)°                      |
|                                                          | γ = 111.096(3)°                    | γ = 108.671(3)°                    | γ = 76.03(3)°                      |
| Volume                                                   | 1683.8(7) Å <sup>3</sup>           | 1623.9(7) Å <sup>3</sup>           | 2337.3(10) Å <sup>3</sup>          |
| Z                                                        | 2                                  | 2                                  | 2                                  |
| Density (Calculated)                                     | 1.236 Mg/m <sup>3</sup>            | 1.233 Mg/m <sup>3</sup>            | 1.076 Mg/m <sup>3</sup>            |
| F(000)                                                   | 660                                | 636                                | 800                                |
| Crystal Size                                             | 0.41 x 0.3 x 0.28 mm <sup>3</sup>  | 0.4 x 0.38 x 0.14 mm <sup>3</sup>  | 0.4 x 0.3 x 0.20 mm <sup>3</sup>   |
| Index Ranges                                             | -13 ≤ h ≤ 13                       | -13 ≤ h ≤ 13                       | -14 ≤ h ≤ 14                       |
|                                                          | -14 ≤ k ≤ 14                       | -16 ≤ k ≤ 16                       | -16 ≤ k ≤ 16                       |
|                                                          | -21 ≤ l ≤ 21                       | -17 ≤ l ≤ 17                       | -23 ≤ l ≤ 22                       |
| Reflection Collected                                     | 22311                              | 20820                              | 32715                              |
| Independent Reflections                                  | 7700 [R(int) = 0.0306]             | 7397 [R(int) = 0.0352]             | 10680 [R(int) = 0.0609]            |
| Completeness                                             | 99.6 %                             | 99.5 %                             | 99.8 %                             |
| Data / restraints / parameters                           | 7700 / 0 / 434                     | 7397 / 0 / 416                     | 10680 / 0 / 524                    |
| Goodness-of-fit on <i>F</i> <sup>2</sup>                 | 1.134                              | 1.300                              | 1.142                              |
| R <sub>1</sub> [ <i>I</i> > 2σ( <i>I</i> )] <sup>a</sup> | R1 = 0.0572                        | R1 = 0.0582                        | R1 = 0.0765                        |
|                                                          | wR2 = 0.1156                       | wR2 = 0.1751                       | wR2 = 0.1470                       |

---

 $wR_2$  (all data)<sup>b</sup>

R1 = 0.0665

R1 = 0.0649

R1 = 0.0891

 $wR_2$  = 0.1200 $wR_2$  = 0.1803 $wR_2$  = 0.1536

---

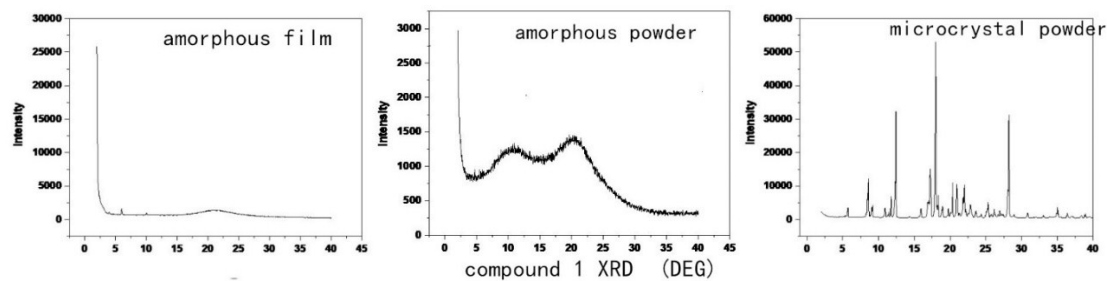

Figure 7S XRD patterns of compound **1** in different morphologic state, amorphous film was obtained by drop-casting of **1** dichloromethane solution, amorphous powder was obtained by grinding the sample which was separated through column separation. Microcrystal powder was obtained by grinding the crystal of **1** which crystallizing in the mixing solvent.

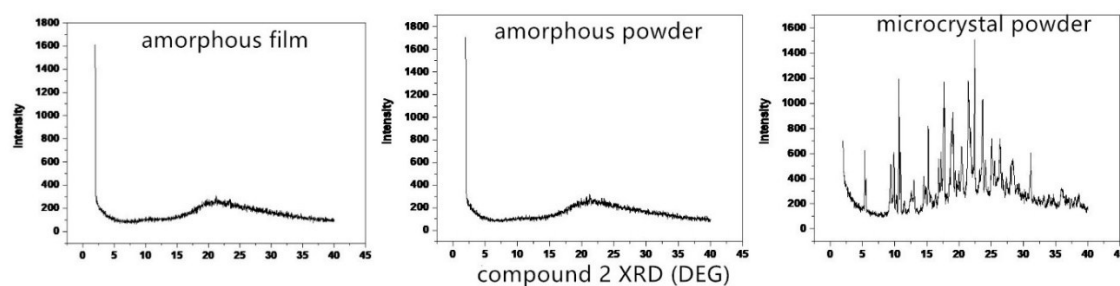

Figure 8S XRD patterns of compound **2** in different morphologic state, amorphous film was obtained by drop-casting of **2** dichloromethane solution, amorphous powder was obtained by grinding the sample which was separated through column separation. Microcrystal powder was obtained by grinding the crystal of **2** which crystallizing in the mixing solvent.

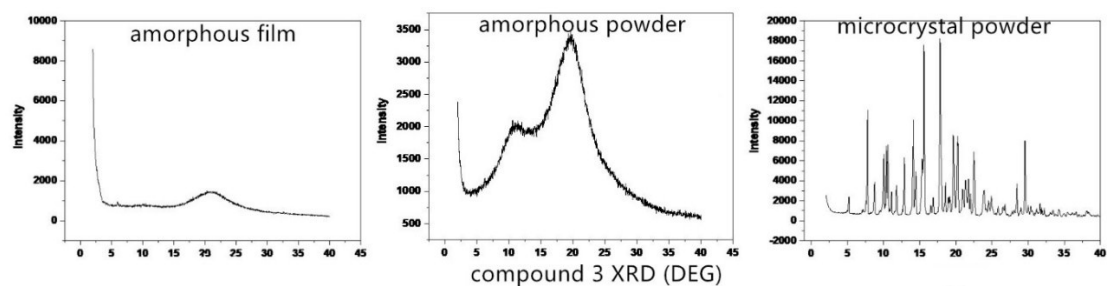

Figure 9S XRD patterns of compound **3** in different morphologic state, amorphous film was obtained by drop-casting of **3** dichloromethane solution, amorphous powder was obtained by grinding the sample which was separated through column separation. Microcrystal powder was obtained by grinding the crystal of **3** which crystallizing in the mixing solvent.

## MALDI,1

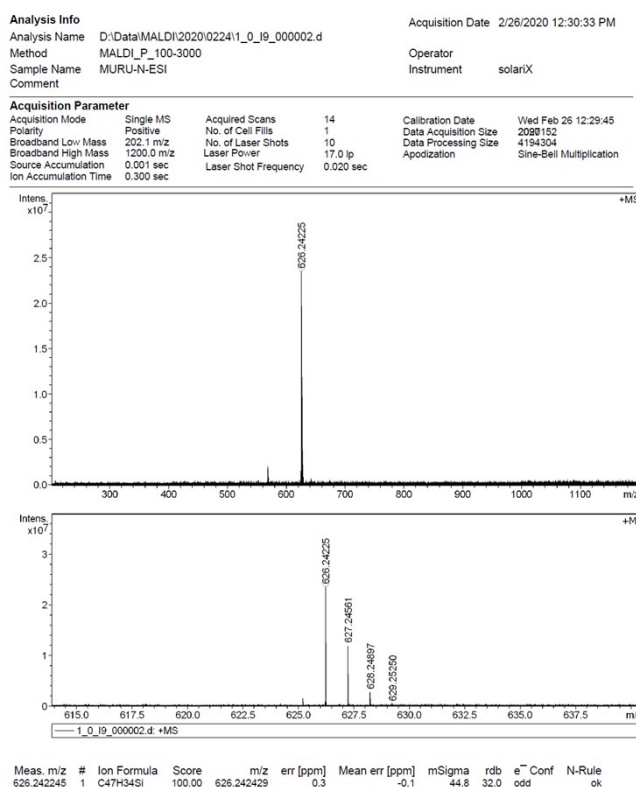

Figure 10S HRMS spectrum of compound **1**



## MALDI,2

**Analysis Info**  
 Analysis Name: D:\Data\MALDI\2020\0224\2\_0\_110\_000001.d  
 Method: MALDI\_P\_100-3000  
 Sample Name: MURU-N-ESI  
 Comment:  
 Acquisition Date: 2/26/2020 12:32:23 PM  
 Operator: solarix  
 Instrument: solarix

**Acquisition Parameter**  
 Acquisition Mode: Single MS  
 Polarity: Positive  
 Broadband Low Mass: 202.1 m/z  
 Broadband High Mass: 1200.0 m/z  
 Source Accumulation: 0.001 sec  
 Ion Accumulation Time: 0.300 sec  
 Acquired Scans: 13  
 No. of Cell Fills: 1  
 No. of Laser Shots: 10  
 Laser Power: 19.0 Ip  
 Laser Shot Frequency: 0.020 sec  
 Calibration Date: Wed Feb 26 12:29:45  
 Data Acquisition Size: 2098152  
 Data Processing Size: 4194304  
 Apodization: Sine-Bell Multiplication

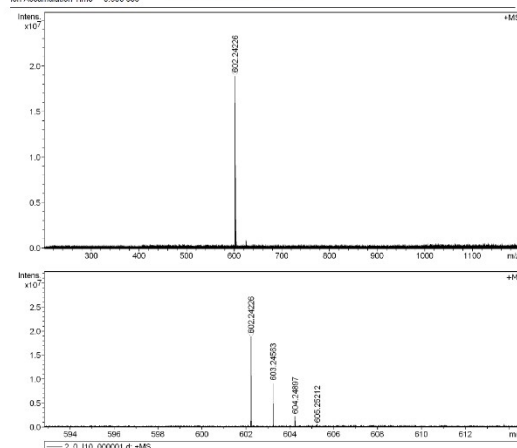

| Meas. m/z  | # | Ion Formula                        | Score  | m/z        | err [ppm] | Mean err [ppm] | mSigma | rdB  | e <sup>-</sup> Conf | N-Rule |
|------------|---|------------------------------------|--------|------------|-----------|----------------|--------|------|---------------------|--------|
| 602.242256 | 1 | C <sub>45</sub> H <sub>34</sub> Si | 100.00 | 602.242429 | -0.3      | -0.2           | 40.9   | 30.0 | odd                 | ok     |

Figure 11S HRMS spectrum of compound 2

## MALDI,3

**Analysis Info**  
 Analysis Name: D:\Data\MALDI\2020\0224\3\_0\_111\_000002.d  
 Method: MALDI\_P\_100-3000  
 Sample Name: MURU-N-ESI  
 Comment:  
 Acquisition Date: 2/26/2020 12:34:06 PM  
 Operator: solarix  
 Instrument: solarix

**Acquisition Parameter**  
 Acquisition Mode: Single MS  
 Polarity: Positive  
 Broadband Low Mass: 202.1 m/z  
 Broadband High Mass: 1400.0 m/z  
 Source Accumulation: 0.001 sec  
 Ion Accumulation Time: 0.300 sec  
 Acquired Scans: 15  
 No. of Cell Fills: 1  
 No. of Laser Shots: 10  
 Laser Power: 20.0 Ip  
 Laser Shot Frequency: 0.020 sec  
 Calibration Date: Wed Feb 26 12:29:45  
 Data Acquisition Size: 2098152  
 Data Processing Size: 4194304  
 Apodization: Sine-Bell Multiplication

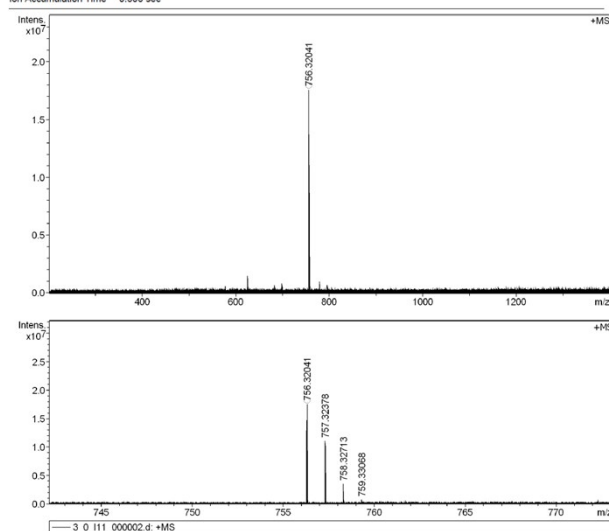

| Meas. m/z  | # | Ion Formula                        | Score  | m/z        | err [ppm] | Mean err [ppm] | mSigma | rdB  | e <sup>-</sup> Conf | N-Rule |
|------------|---|------------------------------------|--------|------------|-----------|----------------|--------|------|---------------------|--------|
| 756.320415 | 1 | C <sub>57</sub> H <sub>44</sub> Si | 100.00 | 756.320679 | -0.4      | -0.0           | 43.4   | 37.0 | odd                 | ok     |

Figure 12S HRMS spectrum of compound 3
